# Supplementary material for: One-year characterization of organic aerosol composition and sources using an extractive electrospray ionization time-of-flight mass spectrometer (EESI-TOF)
Source: Copernicus journal article supplement (doi:10.5194/acp-2019-1165), 2020-01-10
Supplement: Supplementary file 1 [file acp-2019-1165-supplement.pdf]

# Supplement Information

## **One-year characterization of organic aerosol composition and sources using an extractive electrospray ionization time-of-flight mass spectrometer (EESI-TOF)**

Qi Lu<sup>1,2</sup>, Alexander L. Vogel<sup>1,a</sup>, Sepideh Esmaeilrad<sup>1</sup>, Liming Cao<sup>3</sup>, Jing Zheng<sup>4</sup>, Jean-Luc Jaffrezo<sup>5</sup>, Paola Fermo<sup>6</sup>, Anne KaspEr-Giebl<sup>7</sup>, Kaspar R. Daellenbach<sup>b</sup>, Mindong Chen<sup>2</sup>, Xinlei Ge<sup>2</sup>, Urs Baltensperger<sup>1</sup>, André S. H. Prévôt<sup>1</sup>, Jay G. Slowik<sup>1</sup>

<sup>1</sup>Laboratory of Atmospheric Chemistry, Paul Scherrer Institute (PSI), 5232 Villigen, Switzerland

<sup>2</sup>Collaborative Innovation Center of Atmospheric Environment and Equipment Technology, Nanjing University of Information Science & Technology, Nanjing, 210044, China

<sup>3</sup>Key Laboratory for Urban Habitat Environmental Science and Technology, School of Environment and Energy, Peking University Shenzhen Graduate School, Shenzhen, 518055, China

<sup>4</sup>State Key Joint Laboratory of Environmental Simulation and Pollution Control, College of Environmental Sciences and Engineering, Peking University, Beijing 100871, China

<sup>5</sup>University Grenoble Alpes, CNRS, IGE, 38000 Grenoble, France

<sup>6</sup>Department of Chemistry, University of Milan, 20133 Milan, Italy

<sup>7</sup>Institute of Chemical Technologies and Analytics, Vienna University of Technology, 1060 Vienna, Austria

<sup>a</sup>now at: Institute for Atmospheric and Environmental Sciences, Goethe University, Frankfurt am Main, Germany

<sup>b</sup>now at: Institute for Atmospheric and Earth System Research, University of Helsinki, Finland

*Correspondence to:* Jay. G. Slowik ([jay.slowik@psi.ch](mailto:jay.slowik@psi.ch)) and Andre Prévôt ([andre.prevot@psi.ch](mailto:andre.prevot@psi.ch))

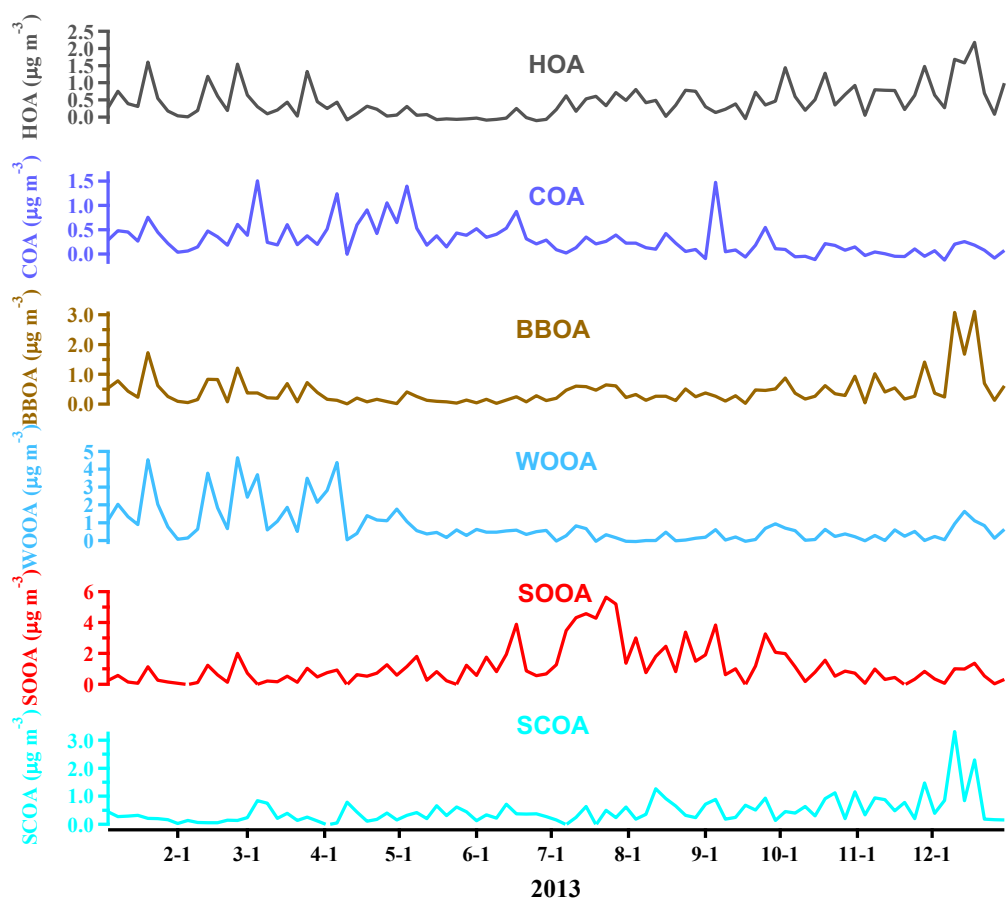

Fig. S1. Time series of AMS source apportionment factors.

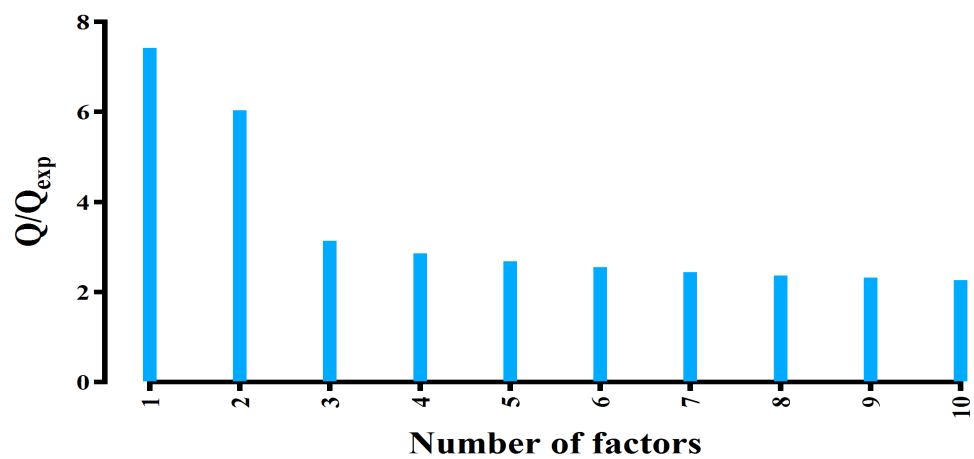

Fig. S2.  $Q/Q_{exp}$  for the solutions consisting of 1 to 10 factors.

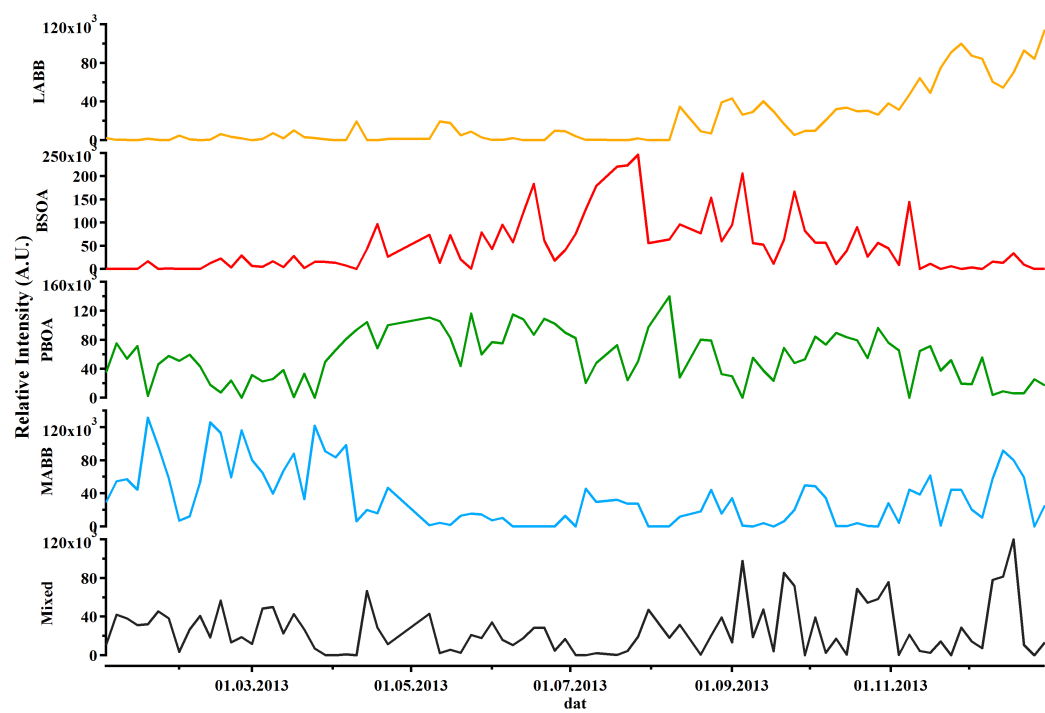

a)

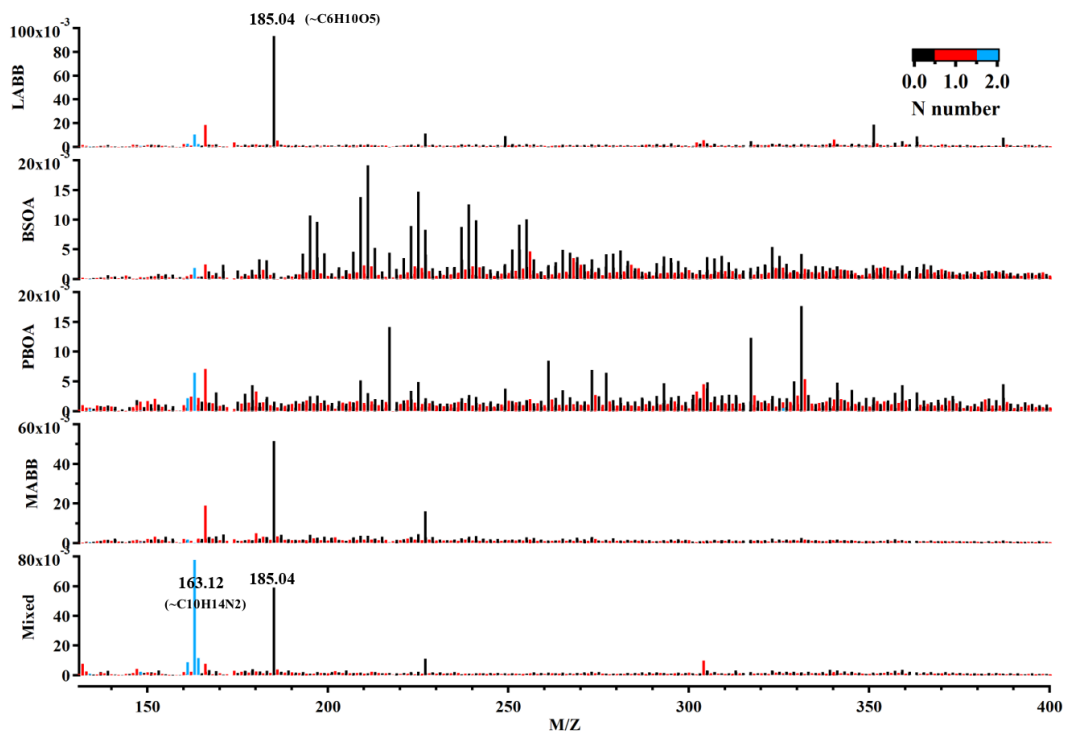

b)

Fig. S3. Time series (a) and profiles (b) of the EESI-TOF 5-factor PMF solution.

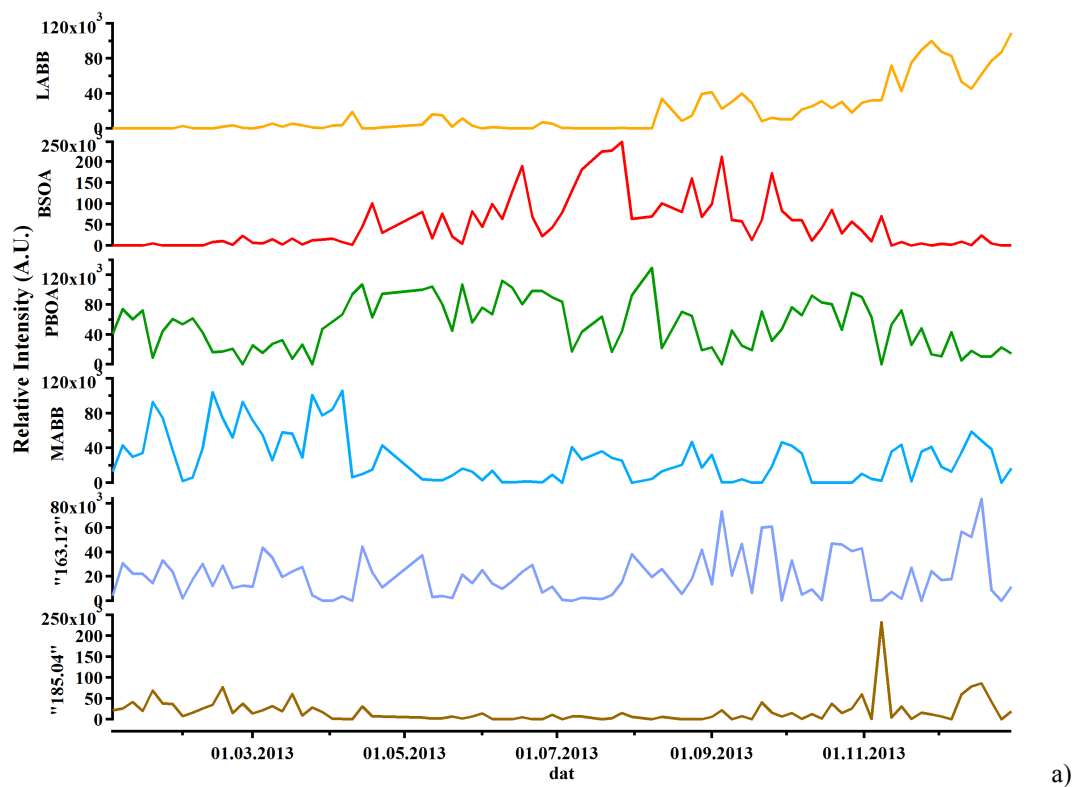

a)

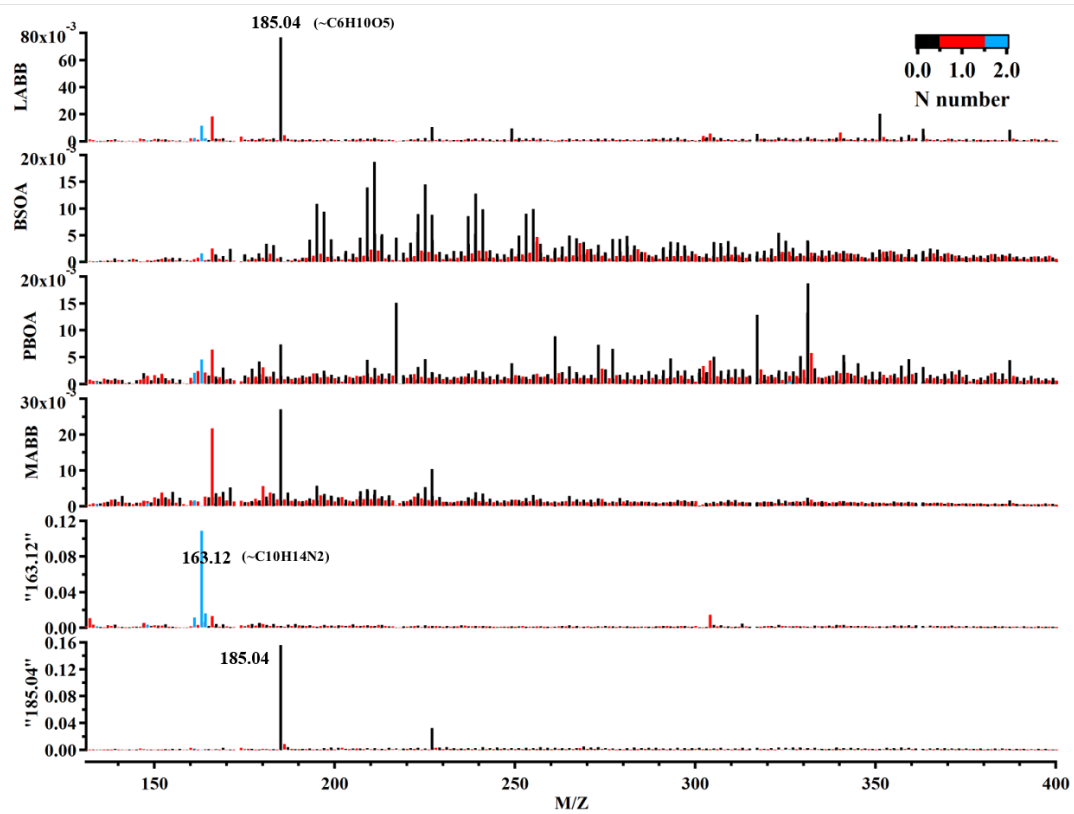

b)

Fig. S4. Time series (a) and profiles (b) of the EESI-TOF 6-factor PMF solution.

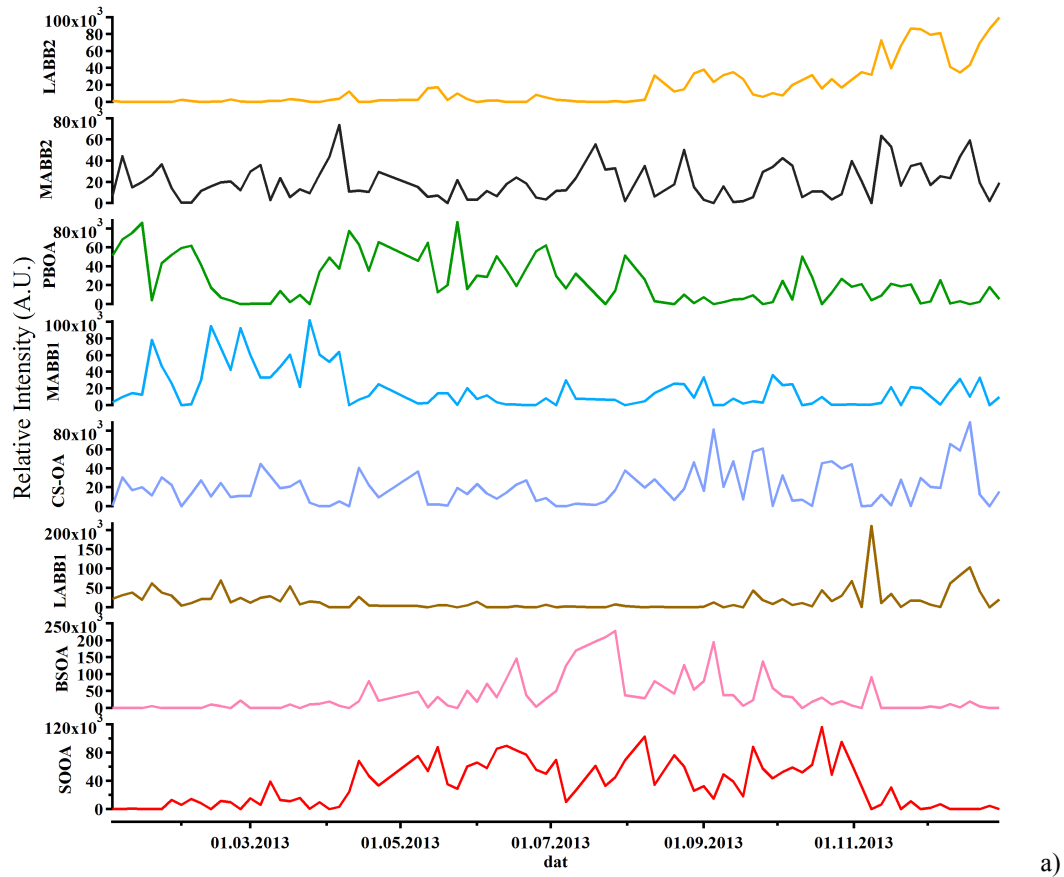

a)

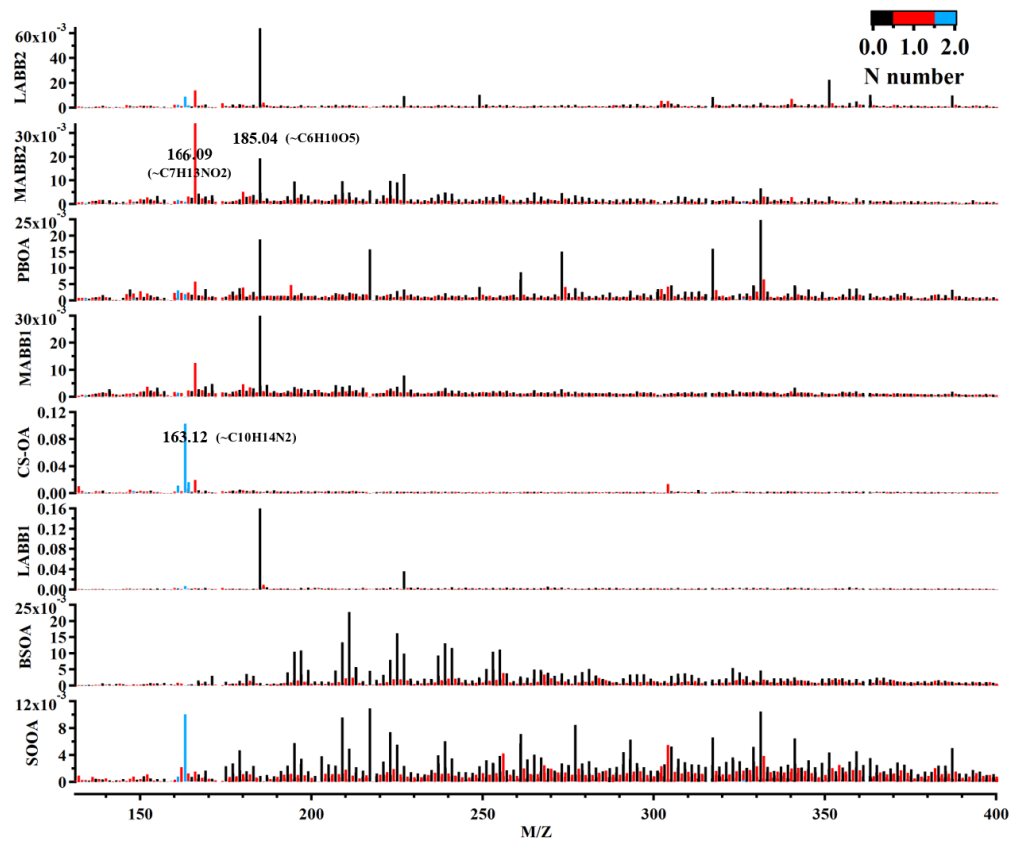

b)

Fig. S5. Time series (a) and profiles (b) of EESI-TOF eight-factors solution.

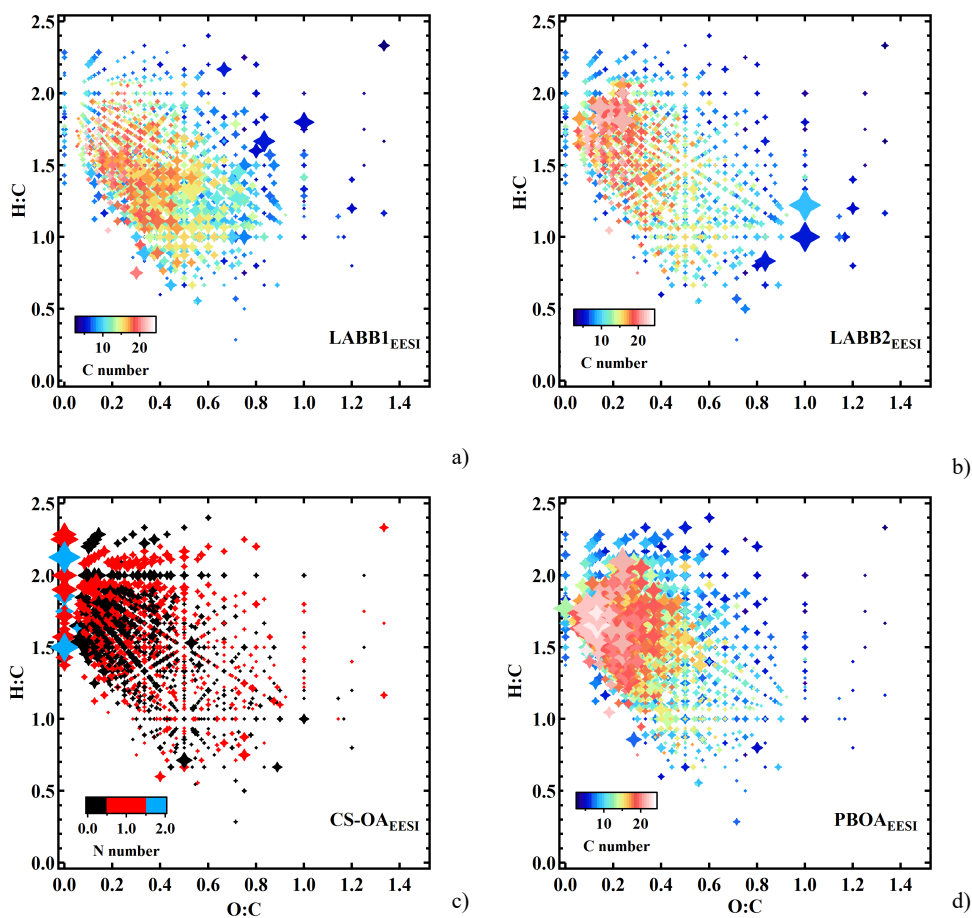

Fig. S6. Van Krevelen plots (atomic H:C vs. O:C ratio) of the  $LABB1_{EESI}$ ,  $LABB2_{EESI}$ ,  $CS-OA_{EESI}$  and  $PBOA_{EESI}$  factor mass spectra. Points are sized by the fraction of each ion apportioned to  $LABB1_{EESI}$ ,  $LABB2_{EESI}$ ,  $CS-OA_{EESI}$  and  $PBOA_{EESI}$ , colored by number of carbon atoms and nitrogen number, respectively.

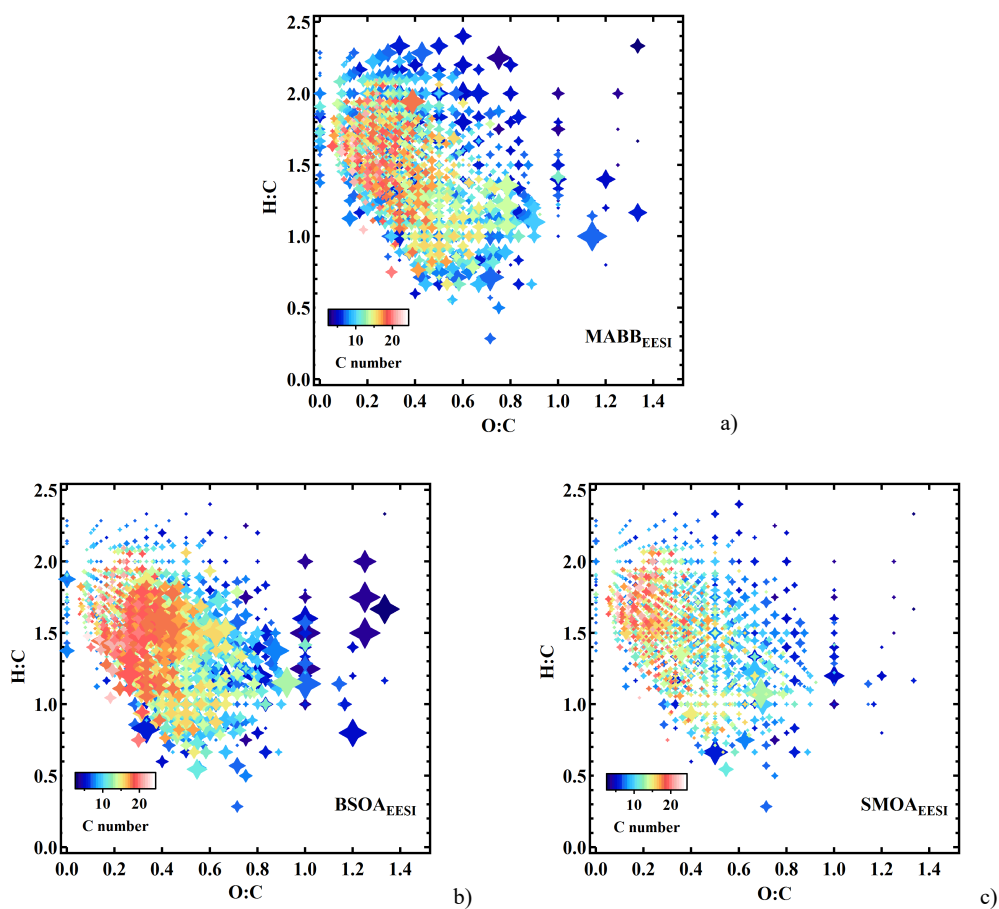

Fig. S7. Van Krevelen plot (atomic H:C vs. O:C ratio) of the MABB<sub>EESI</sub>, SMOA<sub>EESI</sub> and BSOA<sub>EESI</sub> factor mass spectra. Points are sized by the fraction of each ion apportioned to each factor and colored by number of carbon atoms and nitrogen number.

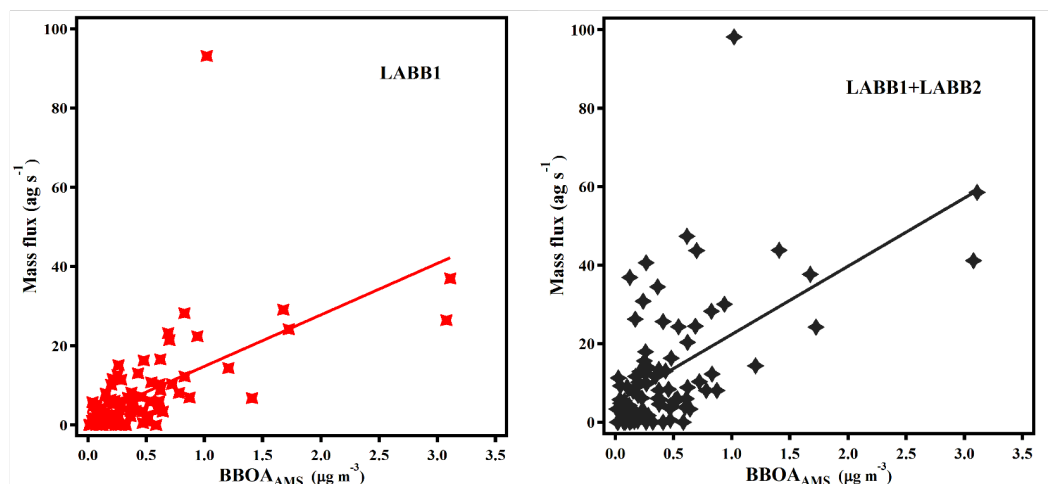

Fig. S8. Scatter plot of the LABB1<sub>EESI</sub> factor and LABB1<sub>EESI</sub>+LABB2<sub>EESI</sub> factor as a function of the



BBOA<sub>AMS</sub> factor.

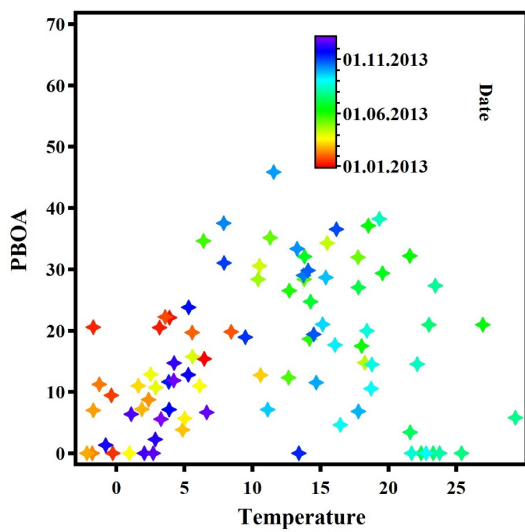

Fig. S9. The scatter plot of the temperature as a function of the PBOA factor of the EESI-TOF PMF.

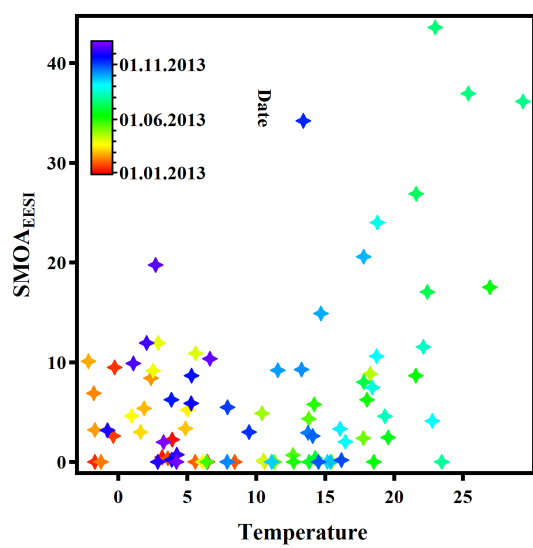

a)

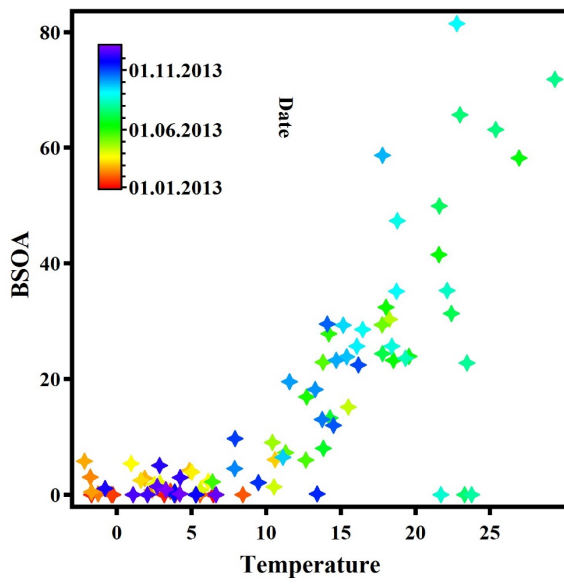

b)

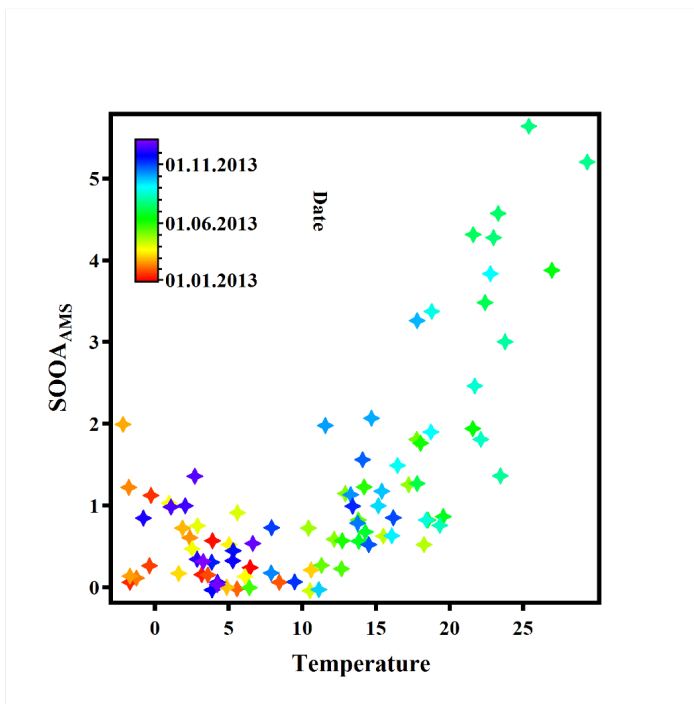

c)

Fig. S10. The scatter plot of the temperature as a function of the  $SMOA_{EESI}$  factor (a),  $BSOA_{EESI}$  factor (b) and  $SOOA_{AMS}$  factor of the EESI-TOF PMF.

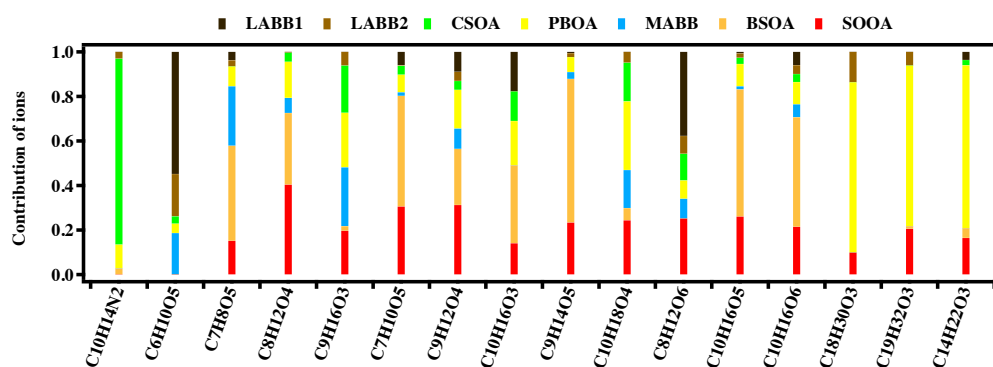

Fig. S11. Contribution of each ions to each factor from EESI-TOF PMF analysis.

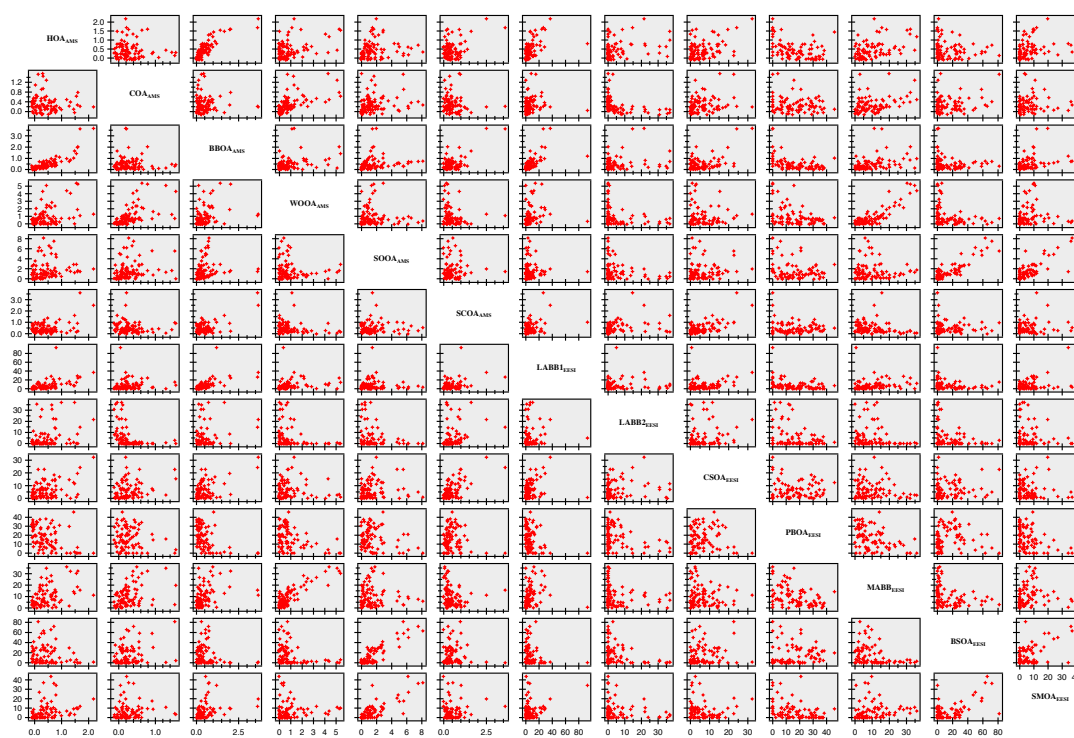

Fig. S12. Correlation between all the AMS and EESI factors.

Table S1. The list of the distinguished molecules of each factor.

| Factor name | Formula | m/z     |  |  |          |         |
|-------------|---------|---------|--|--|----------|---------|
| LABB1       | C5H8O4  | 132.042 |  |  | C6H10O5  | 162.053 |
|             | C5H9NO5 | 163.048 |  |  | C7H11NO6 | 205.059 |
|             |         |         |  |  | C8H12O6  | 204.063 |
|             |         |         |  |  | C8H15NO5 | 205.095 |

|           |         |
|-----------|---------|
| C8H7NO3   | 165.043 |
| C9H11NO3  | 181.074 |
| C9H13NO3  | 183.09  |
| C9H8O3    | 164.047 |
| C10H11NO4 | 209.069 |
| C10H11NO5 | 225.064 |
| C10H11NO6 | 241.059 |
| C10H12O4  | 196.074 |
| C10H12O6  | 228.063 |
| C10H12O7  | 244.058 |
| C10H13NO5 | 227.079 |
| C10H14O7  | 246.074 |
| C11H12O4  | 208.074 |
| C11H12O5  | 224.069 |
| C11H13NO4 | 223.085 |
| C11H13NO5 | 239.079 |
| C11H13NO6 | 255.074 |
| C11H13NO7 | 271.069 |
| C11H14O4  | 210.089 |
| C11H14O6  | 242.079 |
| C11H14O7  | 258.074 |
| C11H14O8  | 274.069 |
| C11H15NO4 | 225.1   |
| C11H16O7  | 260.09  |
| C11H16O8  | 276.085 |
| C12H14O3  | 206.094 |
| C12H14O4  | 222.089 |
| C12H14O7  | 270.074 |
| C12H15NO4 | 237.1   |
| C12H15NO5 | 253.095 |
| C12H15NO6 | 269.09  |
| C12H16O4  | 224.105 |

|           |         |
|-----------|---------|
| C12H16O7  | 272.09  |
| C12H16O8  | 288.085 |
| C13H14O5  | 250.084 |
| C13H14O6  | 266.079 |
| C13H16O4  | 236.105 |
| C13H16O5  | 252.1   |
| C13H16O6  | 268.095 |
| C13H17NO4 | 251.116 |
| C14H14O5  | 262.084 |
| C14H16O5  | 264.1   |
| C14H17NO6 | 295.106 |
| C14H18O5  | 266.115 |
| C14H18O7  | 298.105 |
| C14H20O8  | 316.116 |
| C15H16O6  | 292.095 |
| C15H16O8  | 324.085 |
| C15H18O5  | 278.115 |
| C15H18O6  | 294.11  |
| C15H20O6  | 296.126 |
| C15H20O8  | 328.116 |
| C15H22O8  | 330.132 |
| C16H18O5  | 290.115 |
| C16H20O5  | 292.131 |
| C16H20O6  | 308.126 |
| C16H22O10 | 374.121 |
| C16H22O5  | 294.147 |
| C16H22O6  | 310.142 |
| C16H22O7  | 326.137 |
| C16H23NO5 | 309.158 |
| C16H24O9  | 360.142 |
| C17H20O5  | 304.131 |
| C17H22O5  | 306.147 |

|       |           |         |       |           |         |
|-------|-----------|---------|-------|-----------|---------|
|       | C17H22O6  | 322.142 |       | C17H33NO2 | 283.251 |
|       | C17H24O8  | 356.147 |       | C17H35NO4 | 317.257 |
|       | C17H24O9  | 372.142 |       | C18H31NO5 | 341.22  |
|       | C18H20O7  | 348.121 |       | C18H32O3  | 296.235 |
|       | C18H22O6  | 334.142 |       | C18H32O5  | 328.225 |
|       | C18H22O8  | 366.132 |       | C18H33NO3 | 311.246 |
|       | C18H24O5  | 320.162 |       | C18H33NO4 | 327.241 |
|       | C18H24O7  | 352.152 |       | C18H34O3  | 298.251 |
|       | C18H24O8  | 368.147 |       | C18H34O5  | 330.241 |
|       | C19H18O6  | 342.11  |       | C19H32O5  | 340.225 |
|       | C19H22O6  | 346.142 |       | C19H33NO5 | 355.236 |
|       | C19H22O7  | 362.137 |       | C19H33NO6 | 371.231 |
|       | C19H26O6  | 350.173 |       | C19H34O4  | 326.246 |
|       | C20H24O5  | 344.162 |       | C19H36O3  | 312.267 |
| LABB2 | C5H6O6    | 162.016 |       | C19H36O4  | 328.262 |
|       | C6H5NO5   | 171.017 |       | C20H29NO4 | 347.21  |
|       | C6H6O6    | 174.016 |       | C20H35NO3 | 337.262 |
|       | C6H6O7    | 190.011 |       | C20H38O5  | 358.272 |
|       | C7H4O5    | 168.006 |       | C21H38O3  | 338.282 |
|       | C8H4O6    | 196.001 |       | C21H38O5  | 370.272 |
|       | C13H22O3  | 226.157 |       | C21H40O3  | 340.298 |
|       | C13H24O3  | 228.173 |       | C21H40O4  | 356.293 |
|       | C15H28O4  | 272.199 |       | C21H42O5  | 374.303 |
|       | C16H25NO3 | 279.184 |       | C22H37NO2 | 347.283 |
|       | C16H28O3  | 268.204 |       | C22H38O2  | 334.287 |
|       | C16H29NO5 | 315.205 |       | C22H40O3  | 352.298 |
|       | C17H28O3  | 280.204 |       | C24H31NO2 | 365.236 |
|       | C17H29NO2 | 279.22  | CS-OA | C6H11N2   | 111.092 |
|       | C17H30O5  | 314.209 |       | C6H13NO   | 115.1   |
|       | C17H31NO  | 265.241 |       | C6H13NO3  | 147.09  |
|       | C17H31NO2 | 281.236 |       | C6H9NO    | 111.068 |
|       | C17H31NO5 | 329.22  |       | C7H10N    | 108.081 |

|          |         |
|----------|---------|
| C7H100   | 110.073 |
| C7H11N   | 109.089 |
| C7H11NO  | 125.084 |
| C7H12N   | 110.097 |
| C7H12O   | 112.089 |
| C7H13N2  | 125.108 |
| C7H13NO  | 127.1   |
| C7H14O   | 114.105 |
| C7H14O3  | 146.094 |
| C7H15N   | 113.121 |
| C7H15NO  | 129.115 |
| C7H15NO2 | 145.11  |
| C7H15NO3 | 161.105 |
| C7H15NO4 | 177.1   |
| C7H16N   | 114.128 |
| C7H16O   | 116.12  |
| C8H100   | 122.073 |
| C8H12O   | 124.089 |
| C8H13N   | 123.105 |
| C8H14N   | 124.113 |
| C8H14N2  | 138.116 |
| C8H14O   | 126.105 |
| C8H14O2  | 142.099 |
| C8H15NO  | 141.115 |
| C8H15NO2 | 157.11  |
| C8H16    | 112.125 |
| C8H16N   | 126.128 |
| C8H16O   | 128.12  |
| C8H16O2  | 144.115 |
| C8H16O3  | 160.11  |
| C8H17N2  | 141.139 |
| C8H17NO  | 143.131 |

|           |         |
|-----------|---------|
| C8H17NO3  | 175.121 |
| C8H17NO4  | 191.116 |
| C8H18N    | 128.144 |
| C8H18O    | 130.136 |
| C8H18O3   | 162.126 |
| C9H15N    | 137.121 |
| C9H15NO   | 153.115 |
| C9H17NO   | 155.131 |
| C9H18O3   | 174.126 |
| C9H18O4   | 190.121 |
| C9H19NO   | 157.147 |
| C9H19NO3  | 189.137 |
| C9H20O    | 144.152 |
| C9H20O2   | 160.146 |
| C9H20O3   | 176.141 |
| C10H14O3  | 182.094 |
| C10H15N2  | 163.124 |
| C10H15NO  | 165.115 |
| C10H17NO  | 167.131 |
| C10H18O   | 154.136 |
| C10H19N   | 153.152 |
| C10H19NO  | 169.147 |
| C10H19NO2 | 185.142 |
| C10H20O   | 156.152 |
| C10H21NO  | 171.162 |
| C10H21NO3 | 203.152 |
| C10H21NO4 | 219.147 |
| C10H22O   | 158.167 |
| C11H16O   | 164.12  |
| C11H18O   | 166.136 |
| C11H18O2  | 182.131 |
| C11H18O3  | 198.126 |

|           |         |
|-----------|---------|
| C11H19N   | 165.152 |
| C11H19NO  | 181.147 |
| C11H20O   | 168.152 |
| C11H20O3  | 200.141 |
| C11H21N   | 167.168 |
| C11H21NO  | 183.162 |
| C11H21NO2 | 199.157 |
| C11H22O   | 170.167 |
| C11H23NO3 | 217.168 |
| C11H23NO4 | 233.163 |
| C12H18O   | 178.136 |
| C12H19NO2 | 209.142 |
| C12H20O2  | 196.146 |
| C12H20O3  | 212.141 |
| C12H21NO2 | 211.157 |
| C12H22O   | 182.167 |
| C12H23NO  | 197.178 |
| C12H23NO2 | 213.173 |
| C12H25NO  | 199.194 |
| C12H25NO4 | 247.178 |
| C13H20O   | 192.152 |
| C13H20O2  | 208.146 |
| C13H21NO  | 207.162 |
| C13H21NO2 | 223.157 |
| C13H22O2  | 210.162 |
| C13H23NO  | 209.178 |
| C13H23NO2 | 225.173 |
| C13H24O   | 196.183 |
| C13H25NO  | 211.194 |
| C13H26O3  | 230.188 |
| C13H26O4  | 246.183 |
| C13H27NO3 | 245.199 |

|           |          |         |
|-----------|----------|---------|
| C14H21NO2 | 235.157  |         |
| C14H22O   | 206.167  |         |
| C14H22O2  | 222.162  |         |
| C14H23NO2 | 237.173  |         |
| C14H24O3  | 240.173  |         |
| C14H24O3  | 240.173  |         |
| C14H25NO2 | 239.189  |         |
| C14H27NO2 | 241.204  |         |
| C14H29NO3 | 259.215  |         |
| C15H22O2  | 234.162  |         |
| C15H23NO4 | 281.163  |         |
| C15H24O2  | 236.178  |         |
| C15H26O3  | 254.188  |         |
| C15H27NO  | 237.209  |         |
| C15H27NO2 | 253.204  |         |
| C15H27NO3 | 269.199  |         |
| C15H27NO6 | 317.184  |         |
| C15H28O3  | 256.204  |         |
| C15H29NO2 | 255.22   |         |
| C15H29NO3 | 271.215  |         |
| C15H30O3  | 258.22   |         |
| C16H27NO3 | 281.199  |         |
| C16H31NO3 | 285.231  |         |
| C17H28O2  | 264.209  |         |
| C17H30O3  | 282.22   |         |
| C18H32O4  | 312.23   |         |
| PBOA      | C9H16O2  | 156.115 |
|           | C9H17NO2 | 171.126 |
|           | C12H18O2 | 194.131 |
|           | C12H19NO | 193.147 |
|           | C12H22O5 | 246.147 |
|           | C13H18O4 | 238.121 |

|           |         |
|-----------|---------|
| C13H21NO3 | 239.152 |
| C13H21NO4 | 255.147 |
| C13H23N   | 193.183 |
| C14H21NO3 | 251.152 |
| C14H22O3  | 238.157 |
| C14H22O4  | 254.152 |
| C14H23NO3 | 253.168 |
| C14H24O6  | 288.157 |
| C14H26O5  | 274.178 |
| C14H29NO4 | 275.21  |
| C15H20O4  | 264.136 |
| C15H22O4  | 266.152 |
| C15H23NO2 | 249.173 |
| C15H23NO3 | 265.168 |
| C15H25NO  | 235.194 |
| C15H26O   | 222.198 |
| C15H26O4  | 270.183 |
| C16H22O3  | 262.157 |
| C16H24O3  | 264.173 |
| C16H26O4  | 282.183 |
| C16H27NO  | 249.209 |
| C16H30O3  | 270.22  |
| C16H30O3  | 270.22  |
| C17H22O4  | 290.152 |
| C17H25NO3 | 291.184 |
| C17H25NO4 | 307.178 |
| C17H27NO4 | 309.194 |
| C18H24O4  | 304.168 |
| C18H26O4  | 306.183 |
| C18H27NO5 | 337.189 |
| C18H28O4  | 308.199 |
| C18H29NO2 | 291.22  |

|           |         |         |
|-----------|---------|---------|
| C18H30O2  | 278.225 |         |
| C18H30O3  | 294.22  |         |
| C18H30O4  | 310.215 |         |
| C18H32O7  | 360.215 |         |
| C19H24O5  | 332.162 |         |
| C19H28O3  | 304.204 |         |
| C19H28O4  | 320.199 |         |
| C19H30O3  | 306.22  |         |
| C19H30O4  | 322.215 |         |
| C19H31NO2 | 305.236 |         |
| C19H32O3  | 308.235 |         |
| C19H33NO2 | 307.251 |         |
| C19H34O6  | 358.236 |         |
| C19H34O7  | 374.231 |         |
| C20H26O5  | 346.178 |         |
| C20H30O5  | 350.209 |         |
| C20H31NO4 | 349.225 |         |
| C20H33NO3 | 335.246 |         |
| C20H34O6  | 370.236 |         |
| C20H35NO2 | 321.267 |         |
| C21H30O5  | 362.209 |         |
| C21H34O2  | 318.256 |         |
| C21H34O4  | 350.246 |         |
| C21H44O5  | 376.319 |         |
| C22H34O3  | 346.251 |         |
| C22H36O2  | 332.272 |         |
| C22H37NO3 | 363.278 |         |
| C22H39NO2 | 349.298 |         |
| C23H38O3  | 362.282 |         |
| MABB      | C4H7NO4 | 133.038 |
|           | C4H9NO3 | 119.058 |
|           | C5H10O3 | 118.063 |



|          |         |
|----------|---------|
| C5H11NO3 | 133.074 |
| C5H11NO4 | 149.069 |
| C5H12O3  | 120.079 |
| C5H7NO6  | 177.027 |
| C5H9NO2  | 115.063 |
| C5H9NO3  | 131.058 |
| C5H9NO4  | 147.053 |
| C6H10O2  | 114.068 |
| C6H10O3  | 130.063 |
| C6H11NO2 | 129.079 |
| C6H11NO3 | 145.074 |
| C6H11NO4 | 161.069 |
| C6H11NO5 | 177.064 |
| C6H12O2  | 116.084 |
| C6H12O3  | 132.079 |
| C6H12O4  | 148.074 |
| C6H13NO2 | 131.095 |
| C6H14O2  | 118.099 |
| C6H14O3  | 134.094 |
| C6H5NO4  | 155.022 |
| C6H6O2   | 110.037 |
| C6H7NO8  | 221.017 |
| C6H8O2   | 112.052 |
| C6H9NO2  | 127.063 |
| C7H10O2  | 126.068 |
| C7H11NO2 | 141.079 |
| C7H12O2  | 128.084 |
| C7H13NO3 | 159.09  |
| C7H13NO4 | 175.085 |
| C7H13NO5 | 191.079 |
| C7H14O2  | 130.099 |
| C7H16O2  | 132.115 |

|          |         |
|----------|---------|
| C7H16O3  | 148.11  |
| C7H5NO3  | 151.027 |
| C7H5NO4  | 167.022 |
| C7H5NO5  | 183.017 |
| C7H6O4   | 154.027 |
| C7H7NO5  | 185.032 |
| C7H7NO8  | 233.017 |
| C7H8O6   | 188.032 |
| C7H9NO2  | 139.063 |
| C7H9NO3  | 155.058 |
| C8H10O2  | 138.068 |
| C8H13NO2 | 155.095 |
| C8H15NO3 | 173.105 |
| C8H15NO6 | 221.09  |
| C8H18O2  | 146.131 |
| C8H6O4   | 166.027 |
| C8H7NO6  | 213.027 |
| C8H8O4   | 168.042 |
| C8H9NO   | 135.068 |
| C8H9NO7  | 231.038 |
| C9H10O8  | 246.038 |
| C9H11NO7 | 245.054 |
| C9H11NO8 | 261.048 |
| C9H13NO2 | 167.095 |
| C9H15NO2 | 169.11  |
| C9H15NO3 | 185.105 |
| C9H17NO5 | 219.111 |
| C9H18O2  | 158.131 |
| C9H19NO5 | 221.126 |
| C9H6O6   | 210.016 |
| C9H7NO4  | 193.038 |
| C9H7NO5  | 209.032 |

|           |         |
|-----------|---------|
| C9H8O7    | 228.027 |
| C9H9NO6   | 227.043 |
| C10H10O9  | 274.032 |
| C10H11NO3 | 193.074 |
| C10H11NO8 | 273.048 |
| C10H11NO9 | 289.043 |
| C10H12O2  | 164.084 |
| C10H12O9  | 276.048 |
| C10H14O2  | 166.099 |
| C10H15NO2 | 181.11  |
| C10H17NO2 | 183.126 |
| C10H17NO3 | 199.121 |
| C10H17NO4 | 215.116 |
| C10H19NO4 | 217.131 |
| C10H19NO5 | 233.126 |
| C10H20O3  | 188.141 |
| C10H9NO6  | 239.043 |
| C10H9NO7  | 255.038 |
| C11H11NO7 | 269.054 |
| C11H13NO3 | 207.09  |
| C11H13NO8 | 287.064 |
| C11H14O2  | 178.099 |
| C11H16O2  | 180.115 |
| C11H17NO3 | 211.121 |
| C11H17NO4 | 227.116 |
| C11H19NO4 | 229.131 |
| C11H21NO5 | 247.142 |
| C11H9NO7  | 267.038 |
| C11H9NO8  | 283.033 |
| C12H11NO6 | 265.059 |
| C12H17NO5 | 255.111 |
| C12H19NO3 | 225.137 |

|      |            |         |
|------|------------|---------|
|      | C12H19NO4  | 241.131 |
|      | C12H19NO5  | 257.126 |
|      | C12H21NO4  | 243.147 |
|      | C12H21NO5  | 259.142 |
|      | C12H21NO6  | 275.137 |
|      | C13H13NO7  | 295.069 |
|      | C13H19NO3  | 237.137 |
|      | C14H11NO9  | 337.043 |
|      | C14H15NO10 | 357.07  |
|      | C14H17NO11 | 375.08  |
|      | C14H19NO10 | 361.101 |
|      | C14H19NO11 | 377.096 |
|      | C15H15NO10 | 369.07  |
|      | C15H21NO3  | 263.152 |
| BSOA | C3H5NO4    | 119.022 |
|      | C4H5NO4    | 131.022 |
|      | C4H6O4     | 118.027 |
|      | C4H6O5     | 134.022 |
|      | C4H7NO5    | 149.032 |
|      | C5H6O3     | 114.032 |
|      | C5H6O4     | 130.027 |
|      | C5H7NO4    | 145.038 |
|      | C5H8O5     | 148.037 |
|      | C6H5NO2    | 123.032 |
|      | C6H7NO4    | 157.038 |
|      | C7H10O6    | 190.048 |
|      | C7H11NO5   | 189.064 |
|      | C7H11NO7   | 221.054 |
|      | C7H8O7     | 204.027 |
|      | C8H11NO7   | 233.054 |
|      | C8H12O5    | 188.069 |
|      | C8H9NO4    | 183.053 |

|           |         |
|-----------|---------|
| C9H12O6   | 216.063 |
| C9H13NO5  | 215.079 |
| C9H13NO6  | 231.074 |
| C9H13NO7  | 247.069 |
| C9H14O5   | 202.084 |
| C9H8O5    | 196.037 |
| C9H8O6    | 212.032 |
| C10H10O5  | 210.053 |
| C10H10O6  | 226.048 |
| C10H14O6  | 230.079 |
| C10H15NO7 | 261.085 |
| C10H16O5  | 216.1   |
| C10H16O6  | 232.095 |
| C11H17NO5 | 243.111 |
| C11H17NO6 | 259.106 |
| C11H17NO7 | 275.101 |
| C11H18O5  | 230.115 |
| C11H19NO7 | 277.116 |
| C11H9NO5  | 235.048 |
| C12H11NO5 | 249.064 |
| C12H17NO7 | 287.101 |
| C12H18O5  | 242.115 |
| C12H18O6  | 258.11  |
| C12H19NO6 | 273.121 |
| C12H19NO7 | 289.116 |
| C12H20O5  | 244.131 |
| C13H13NO5 | 263.079 |
| C13H15NO5 | 265.095 |
| C13H19NO6 | 285.121 |
| C13H20O5  | 256.131 |
| C13H20O7  | 288.121 |
| C13H22O6  | 274.142 |

|            |         |
|------------|---------|
| C14H20O6   | 284.126 |
| C14H22O5   | 270.147 |
| C14H22O6   | 286.142 |
| C14H23NO4  | 269.163 |
| C14H24O5   | 272.162 |
| C14H25NO5  | 287.173 |
| C15H21NO7  | 327.132 |
| C15H22O6   | 298.142 |
| C15H22O7   | 314.137 |
| C15H23NO10 | 377.132 |
| C15H23NO5  | 297.158 |
| C15H23NO6  | 313.153 |
| C15H23NO7  | 329.148 |
| C15H23NO9  | 361.137 |
| C15H24O5   | 284.162 |
| C15H24O7   | 316.152 |
| C15H25NO5  | 299.173 |
| C15H25NO6  | 315.168 |
| C15H25NO7  | 331.163 |
| C15H26O5   | 286.178 |
| C15H28O5   | 288.194 |
| C16H15NO5  | 301.095 |
| C16H17NO5  | 303.111 |
| C16H19NO5  | 305.126 |
| C16H24O10  | 376.137 |
| C16H24O5   | 296.162 |
| C16H24O6   | 312.157 |
| C16H24O7   | 328.152 |
| C16H26O5   | 298.178 |
| C17H24O7   | 340.152 |
| C17H25NO8  | 371.158 |
| C17H26O5   | 310.178 |

|      |           |         |  |           |         |
|------|-----------|---------|--|-----------|---------|
|      | C17H27NO5 | 325.189 |  | C8H1004   | 170.058 |
|      | C17H27NO6 | 341.184 |  | C8H1005   | 186.053 |
|      | C17H27NO7 | 357.179 |  | C8H1203   | 156.079 |
|      | C17H29NO5 | 327.205 |  | C8H1204   | 172.074 |
|      | C18H2004  | 300.136 |  | C8H13NO4  | 187.085 |
|      | C18H23NO3 | 301.168 |  | C8H13NO6  | 219.074 |
|      | C18H26O3  | 290.188 |  | C8H1404   | 174.089 |
|      | C18H26O5  | 322.178 |  | C8H1405   | 190.084 |
|      | C18H27NO7 | 369.179 |  | C9H11NO5  | 213.064 |
|      | C18H28O5  | 324.194 |  | C9H1204   | 184.074 |
|      | C18H28O7  | 356.184 |  | C9H1205   | 200.069 |
|      | C18H28O8  | 372.179 |  | C9H1403   | 170.094 |
|      | C18H29NO6 | 355.2   |  | C9H1404   | 186.089 |
|      | C18H29NO7 | 371.195 |  | C9H1406   | 218.079 |
|      | C18H30O5  | 326.209 |  | C9H15NO4  | 201.1   |
|      | C19H21NO5 | 343.142 |  | C9H15NO6  | 233.09  |
|      | C19H23NO5 | 345.158 |  | C9H1604   | 188.105 |
|      | C19H25NO5 | 347.173 |  | C9H1605   | 204.1   |
|      | C19H28O6  | 352.189 |  | C10H1404  | 198.089 |
|      | C19H28O7  | 368.184 |  | C10H1405  | 214.084 |
|      | C21H26O4  | 342.183 |  | C10H1604  | 200.105 |
| SOOA | C5H7NO3   | 129.043 |  | C10H17NO6 | 247.106 |
|      | C6H4O3    | 124.016 |  | C10H1805  | 218.115 |
|      | C6H7NO2   | 125.048 |  | C11H1604  | 212.105 |
|      | C6H8O4    | 144.042 |  | C11H1605  | 228.1   |
|      | C7H1004   | 158.058 |  | C11H1804  | 214.121 |
|      | C7H1005   | 174.053 |  | C12H1603  | 208.11  |
|      | C7H11NO4  | 173.069 |  | C12H2004  | 228.136 |
|      | C7H1204   | 160.074 |  | C13H1803  | 222.126 |
|      | C7H1205   | 176.069 |  | C13H2004  | 240.136 |
|      | C7H2O5    | 165.99  |  | C14H1803  | 234.126 |
|      | C7H8O4    | 156.042 |  | C14H19NO5 | 281.126 |

|          |         |
|----------|---------|
| C14H20O3 | 236.141 |
| C15H20O3 | 248.141 |
| C15H22O3 | 250.157 |

|           |         |
|-----------|---------|
| C16H24O2  | 248.178 |
| C16H25NO4 | 295.178 |
| C16H26O2  | 250.193 |
